## **Vascular dysregulation following SARS-CoV-2 infection involves integrin signalling through a VE-Cadherin mediated pathway**

Danielle Nader<sup>1</sup>, Steve Kerrigan<sup>1\*</sup>

<sup>1</sup>RCSI University of Medicine and Health Sciences, School of Pharmacy and Biomolecular Sciences (PBS), 123 St. Stephen's Green, Dublin 2, Ireland.

\*Correspondence to Professor Steve W. Kerrigan (skerrigan@rcsi.ie)

### **Abstract**

The vascular barrier is heavily injured following SARS-CoV-2 infection and contributes enormously to life-threatening complications in COVID-19. This endothelial dysfunction is associated with the pathologic phenomenon of cytokine storms, thrombotic complications, abnormal coagulation, hypoxemia, and multiple organ failure. The mechanisms surrounding COVID-19 associated endotheliitis have been widely attributed to ACE2-mediated pathways. However, integrins have emerged as possible receptor candidates for SARS-CoV-2, and their complex intracellular signalling events are essential for maintaining endothelial homeostasis. Here, we showed that the spike protein of SARS-CoV-2 depends on its RGD motif to drive barrier dysregulation through hijacking integrin  $\alpha V\beta 3$ . This triggers the redistribution and internalization of major junction protein VE-Cadherin which leads to the barrier disruption phenotype. Both extracellular and intracellular inhibitors of integrin  $\alpha V\beta 3$  prevented these effects, similarly to the RGD-cyclic peptide compound Cilengitide, which suggests that the spike protein – through its RGD motif – binds to  $\alpha V\beta 3$  and elicits vascular leakage events. These findings support integrins as an additional receptor for SARS-CoV-2, particularly as integrin engagement can elucidate many of the adverse endothelial dysfunction events that stem from COVID-19.

## 1 **Introduction**

2 The interaction between the spike protein of SARS-coronavirus-2 (SARS-CoV-2) and endothelial cells  
3 has been widely demonstrated to be a critical driver in vascular dysregulation observed in COVID-19.  
4 We were the first to describe a pattern of impaired vascular functionality following SARS-CoV-2  
5 infection, and theorized that the major endothelial adherens junction protein, VE-Cadherin, was  
6 involved<sup>1</sup>. A plethora of data now confirms this finding, where the disruption of junction proteins leads  
7 to reduced endothelial barrier integrity and subsequent monolayer permeability, elucidating the vast  
8 cardiovascular complications and septic shock experienced in severe COVID-19<sup>2</sup>. Although the  
9 canonical ACE2 receptor has been implicated in driving this reaction, another potential mechanism of  
10 action involves an integrin-mediated pathway. These heterodimeric transmembrane proteins are key  
11 regulators of haemostasis, angiogenesis, proliferation, and inflammation. Activated through binding an  
12 RGD-containing ligand, integrins can control downstream signalling transduction cascades that tether  
13 VE-Cadherin at the cell junctions through RhoGTPase cycling<sup>3,4</sup>. The spike protein contains an integrin-  
14 binding RGD motif that adheres to integrins  $\alpha V\beta 3$  and  $\alpha 5\beta 1$  on pulmonary epithelial cells and  
15 endothelial cells, where integrin antagonists Cilengitide and ATN-161 have demonstrated success in  
16 inhibiting this interaction *in vitro* and *in vivo*, thereby suggesting integrin-targeted therapeutics in  
17 COVID-19<sup>1,5-8</sup>. We aimed to identify the direct pathway that associates integrins with vascular  
18 dysregulation during SARS-CoV-2 infection, and whether targeting the spike protein RGD motif is  
19 sufficient to reduce this disease phenotype.

## 20 **Methods**

### 21 *Cell and virus culture conditions*

22 Primary-derived Human Aortic Endothelial Cells (HAoEC; Promocell C-12271) were maintained in  
23 Endothelial Cell Media MV (PromoCell) supplemented with 10,000 U/mL Penicillin and 100 mg/mL  
24 Streptomycin. Cells were subject to 10 dynes/cm<sup>2</sup> of shear stress. Human 2019-nCoV strain 2019-  
25 nCoV/Italy-INMI1 was obtained from the European Virus Archive Global (Ref. no: 008V-03893) and  
26 experiments were carried out using a Multiplicity of Infection (MOI) of 0.4.

### 27 *ELISA*

28 Interactions between recombinant spike proteins and integrins were performed as described previously<sup>1</sup>.  
29 Briefly, a 96-well microplate was coated with 25 ng of integrin  $\alpha V\beta 3$  (3050-AV, R&D Systems)  
30 overnight at 4°C and blocked in 5 % dry milk in 0.1 % Tween 20-PBS. Anti- $\alpha V\beta 3$  mAB (MAB1876-  
31 Z, 1:100), anti- $\beta 3$  mAB (sc-46655, 1:100), Cilengitide (0.0005-0.05  $\mu$ M), GLPG-0187 (0.05-10  $\mu$ M)  
32 and Spike proteins (40591-V08H41, 40591-V08H23, 50 nM) were added and washed. After incubation  
33 for 1 hour with AlexaFluor 405-labeled spike protein antibodies (FAB105403V, 1:100), absorbance  
34 was measured at 405 nm.

35 *Endothelial permeability and immunofluorescence assays*

36 Endothelial barrier injury and VE-Cadherin expression was measured using transwell permeability  
37 assays and immunofluorescence as described previously<sup>1</sup>. Briefly, HAoEC were grown to confluence  
38 on top chambers of inserts and infected with SARS-CoV-2 for 24 hours. Cells were pre-treated for 30  
39 minutes with Src and FAK inhibitors (SU6656, PF562271, 1  $\mu$ M). Fluorescein isothiocyanate-dextran  
40 (250 $\mu$ g/mL, 40kDa, Sigma-Aldrich) was added to the chambers and fluorescent intensity measured at  
41 490/520 nm wavelengths. Cells grown on glass slides were infected and stained using anti-VE-Cadherin  
42 mouse monoclonal IgG1 antibody, conjugated to AlexaFluor 488 (F-8 sc-9989, 1:100), overlaid onto  
43 Fluoroshield mounting medium (ab104139). To measure internal VE-Cadherin, cells were acid washed  
44 briefly following antibody staining. Cells were images using AxioObserver Z1 microscope.

45 *Western blot analysis of VE-Cadherin*

46 HAoEC were grown to confluency, pre-treated with Cilengitide (0.0005  $\mu$ M) and infected with SARS-  
47 CoV-2 for 24 hours. Scraped supernatants were collected in 150  $\mu$ L RIPA buffer. Proteins (10  $\mu$ g) were  
48 loaded into an SDS-PAGE and stained using anti-VE-Cadherin mouse antibodies (F-8, sc-9989, 1:200)  
49 followed by anti-mouse secondary antibodies (sc-525405, 1:5000). GAPDH (ab-8245) was used as a  
50 loading control.

51 **Results**

52 *SARS-CoV-2 Variants of Concern recognize integrin  $\alpha$ V $\beta$ 3 through conserved RGD site*

53 *In silico* modelling of the spike protein RGD site (403-405) located with the receptor binding domain  
54 (RBD) has predicted numerous points of contact with its putative integrin receptor,  $\alpha$ V $\beta$ 3<sup>1</sup>. It has been  
55 proposed that select mutations within SARS-CoV-2 variants of concern enable a more wide-open RBD,  
56 thereby increasing the likelihood of host-virus recognition<sup>9</sup>. We performed ELISA-based assays to  
57 confirm the direct binding between integrin  $\alpha$ V $\beta$ 3 and spike protein of wild-type, Delta (B.1.617.2),  
58 and Omicron (B.1.1.529), in the presence or absence of the cyclic RGD peptide compound Cilengitide  
59 and neutralising monoclonal antibodies which target the active site of the  $\alpha$ V $\beta$ 3 integrin or the  $\beta$ 3  
60 subunit. Cilengitide was successful in reducing the association between the integrin and spike protein,  
61 similarly to antibodies, revealing the interaction is likely RGD-dependent (Fig. 1A,B). Comparatively,  
62 other integrin antagonists have demonstrated efficacy in reducing spike protein adherence to integrins  
63 such as GLPG-0187, a broad-spectrum pan integrin inhibitor<sup>8,10</sup>. Although successful at high  
64 concentrations, GLPG-0187 was unable to maintain sufficient blocking between the proteins, unlike  
65 Cilengitide which remained effective even at subnanomolar levels (Fig. 1C).

66

67

68 *Spike protein causes VE-Cadherin internalization which disrupts vascular permeability*

69 Following spike protein engagement of integrins, reduced expression of some intercellular junction  
70 proteins (JAM-A and Connexin-43) has been detected in cerebral microvascular cells, alongside  
71 downregulation of the major adherens junction protein VE-Cadherin, which functions to mediate cell-  
72 cell adhesion<sup>2</sup>. Furthermore, evidence suggests SARS-CoV-2 spike protein directly induces this  
73 hyperpermeability through its RGD site, as treatment using the RGD peptide compound Cilengitide  
74 reduced inter-endothelial gaps and restored barrier function<sup>1</sup>. However, RGD-recognizing integrins are  
75 known to spatio-temporally coordinate the intracellular cycling of specific RhoGTPases to control VE-  
76 Cadherin without stimulating its downregulation<sup>11</sup>. To investigate this matter, we evaluated whether the  
77 endothelium could experience hyperpermeability through VE-Cadherin localisation during SARS-  
78 CoV-2 infection. Cell-surface or external VE-Cadherin levels were drastically reduced following viral  
79 infection for 24 hours, and blocking the RGD-binding site of integrins on host endothelial cells  
80 prevented this phenomenon (Fig. 2A,B). To measure non-surface bound VE-Cadherin, we utilised an  
81 acid-wash immunofluorescence staining protocol that enables the detection of internalised proteins. The  
82 amount of VE-Cadherin trafficked to intracellular compartments was significant in viral infected cells,  
83 revealing that intricate VE-Cadherin dynamics are likely involved in modulating endothelial  
84 permeability during COVID-19.

85 *Cilengitide reduces spike-induced endothelial dysregulation*

86 Treating the infected cells with the  $\alpha V\beta 3$  integrin antagonist Cilengitide reduced the amount of internal  
87 VE-Cadherin to nearly uninfected basal levels (Fig. 2A,B). Our findings reveal that the spike protein  
88 binding to integrin  $\alpha V\beta 3$  directly triggers the integrin-mediated VE-Cadherin pathway in endothelial  
89 cells responsible for controlling vascular permeability. Moreover, the RGD site of the spike protein  
90 drives this pathway. Our data additionally revealed that overall VE-Cadherin levels were consistently  
91 stable in both healthy and infected vascular endothelial cells (Fig. 2C).

92 *Targeting intracellular integrin pathways can prevent vascular dysregulation following infection*

93 Focal adhesion kinase (FAK) and Proto-oncogene tyrosine-protein kinase Src (Src) are non-receptor  
94 tyrosine kinases that localise to the integrin  $\beta$  tail, and are widely implicated in coordinating integrin  
95 signalling transduction in response to an external stimuli such as adhering to an RGD ligand. Since  
96 these proteins regulate the RhoGTPases that control VE-Cadherin internalisation, we investigated  
97 whether inhibiting these proteins associated with the integrin could also encourage similar events of  
98 vascular barrier protection as the integrin antagonist. Inhibition of FAK and Src prevented endothelial  
99 hyperpermeability in response to SARS-CoV-2 infection over 24 hours. Furthermore, this reduction  
100 was comparable to Cilengitide (Fig. 2D).

101

## 102 Discussion

103 Clinical observations of viral endotheliitis, pulmonary thrombosis, hypoxia, oedema, and acute cardiac  
104 injury in patients with severe COVID-19 is indicative of a dysfunctional endothelial barrier, which  
105 establishes it as a vascular disease<sup>12</sup>. The relationship between SARS-CoV-2 spike protein and its host  
106 receptor ACE2 has been well defined, and a dual-receptor mechanism has been proposed with another  
107 cell surface receptor, integrins. In particular, integrins  $\alpha V\beta 3$  and  $\alpha 5\beta 1$  recognize the RGD motif  
108 uniquely expressed by SARS-CoV-2, which mediates infection of epithelial and endothelial cells *in*  
109 *vitro* and *in vivo*<sup>1,5-8</sup>. Subsequently, inter-endothelial junction weakening and hyperpermeability has  
110 been observed, which likely elucidates the pulmonary and cardiovascular complications in COVID-  
111 19<sup>1,2,7</sup>. Inhibiting spike protein attachment hinders this response<sup>1,7</sup>. Therefore we sought to describe the  
112 pathway correlating integrins to COVID-19 vascular dysregulation via VE-Cadherin.

113 Our work has identified the downstream signalling transduction cascade that links integrins directly to  
114 the observations of vasculopathy in COVID-19. Firstly, the spike proteins of Delta and Omicron SARS-  
115 CoV-2 variants of concern are still highly recognized by integrin  $\alpha V\beta 3$  as they both retain the RGD  
116 site. Both Cilengitide and integrin neutralising antibodies similarly blocked spike binding to integrins,  
117 revealing that this interaction is likely RGD-dependent. Other integrin antagonists such as GLPG-0187  
118 have successfully displayed efficacy in reducing spike protein infection when used at high  
119 concentrations, confirming its involvement as a spike protein receptor<sup>8</sup>. However, when tested at similar  
120 concentrations to Cilengitide (0.05 $\mu$ M), it failed to prevent attachment. This may be due to the broad-  
121 spectrum activity of GLPG-0187 compared to the highly specific affinity Cilengitide has towards  $\alpha V\beta 3$   
122 (IC<sub>50</sub>=0.58 nM). Similarly to the  $\alpha 5\beta 1$  antagonist ATN-161, Cilengitide has undergone clinical trials  
123 for the treatment of glioblastoma where it was greatly tolerated by patients due to its notable safety  
124 profile<sup>13</sup>. This has critical implications for COVID-19 treatment. Neutralizing antibodies recognize the  
125 ACE2 binding interface located on the spike protein surface (residues 437 – 507), and therefore  
126 mutations affecting receptor recognition often result in antibody evasion. Some *in vivo* and *in vitro*  
127 success has been observed using antibody cocktails to reduce viral load in SARS-CoV-2, particularly  
128 Etesevimab and Bamlanivimab combined therapy<sup>14</sup>. However, both antibodies were sensitive to  
129 mutations found in circulating variants of concern B.1.351 and B.1.617.2, and B.1.1.529 was partially  
130 or completely resistant to 100% of neutralizing monoclonal antibodies<sup>15</sup>. The RGD (403-405) motif is  
131 located within the spike receptor binding domain and is conserved across >99% of variants. As vaccine  
132 and immune-induced immunity is a key contributor to viral evolution, developing a compound that  
133 targets less immunodominant epitopes such as the RGD motif could be a more effective strategy against  
134 SARS-CoV-2 variants.

135 Our group was the first to identify that intercellular proteins were involved in SARS-CoV-2  
136 pathogenesis and this likely corresponded to the hyperpermeability observed across the endothelium in

137 COVID-19<sup>1</sup>. We previously identified the major adherens junction protein VE-Cadherin to be directly  
138 impacted during viral infection, where it was notably missing from its expected occupancy at the cell-  
139 cell contacts. When endothelial cells typically undergo angiogenesis and cell migration is required, the  
140 Rho GTPases Rac1 and RhoA tightly regulate stress fiber formation, whose spatially coordinated  
141 activation are triggered by integrins<sup>11</sup>. Subsequently, VE-Cadherin can undergo translocation into  
142 intracellular compartments via clathrin-mediated endocytosis, upon integrin activation and downstream  
143 transduction signalling involving the major focal adhesion proteins FAK and Src<sup>3</sup>. We propose that  
144 SARS-CoV-2 hijacks integrins via its RGD motif and controls its signalling cascade to command  
145 endothelial permeability. This ensures severe hypoxia and serum leakage, circulatory collapse and  
146 organ failure, which are key indicators of sepsis development. Critically, sepsis-related morbidity has  
147 been significantly attributed to COVID-19 deaths in both ICU and non-ICU patients. To explicate this  
148 matter, we evaluated the involvement of VE-Cadherin following spike protein infection. Although  
149 previous data suggests that VE-Cadherin was downregulated to some extent alongside other gap and  
150 tight junction proteins, here we showed that SARS-CoV-2 spike protein binding to integrin  $\alpha$ V $\beta$ 3 did  
151 not have any obvious effect on VE-Cadherin levels. However, infection dramatically altered VE-  
152 Cadherin organization by triggering its internalisation, which led to the dysfunctional barrier phenotype.  
153 Furthermore, the spike protein of SARS-CoV-2 has been demonstrated to signal the upregulation of  
154 RhoA in infected venous endothelial cells by downregulating Rac1, which promoted permeability and  
155 leakage<sup>7</sup>. Following integrin ligation, VE-Cadherin is known to coordinate with Rac1 to inhibit RhoA  
156 to regulate cell spreading<sup>16</sup>(Fig. 3). This is consistent with our own findings where we have found an  
157 association between  $\alpha$ V $\beta$ 3 and cell permeability, a process tightly controlled by VE-Cadherin.

158 Additionally, several tyrosine sites across the cytoplasmic tail of VE-Cadherin undergo phosphorylation  
159 via FAK and Src proteins, and elevated phosphorylation of Y658 and Y731 accounts for the majority  
160 of barrier breakdowns<sup>17</sup>. Pharmacological inhibition of Src and its substrate FAK was effective in  
161 stabilizing VE-Cadherin at cell surface due to the significantly reduced endothelial permeability during  
162 SARS-CoV-2 infection. However, it has been reported that halting Src-mediated phosphorylation of  
163 VE-Cadherin is not especially sufficient to fully repair the endothelial barrier, suggesting a myriad of  
164 intracellular protein inhibitors would be required to suspend this occurrence<sup>18</sup>. Therefore, we suggest  
165 that eliminating the initial contact between viral and host protein – such as using integrin antagonists –  
166 would be more effective.

167 These early findings speculate that integrin engagement with the RGD-containing spike protein triggers  
168 a signalling cascade through FAK and Src, resulting in the downregulation of Rac1, increase in RhoA,  
169 and subsequent internalization of VE-Cadherin. Although some VE-Cadherin downregulation has been  
170 documented to occur, plasma membrane-associated VE-Cadherin can translocate into intracellular  
171 compartments following integrin activation through the RGD site of spike protein. As pools of  
172 endocytosed cadherins get recycled back to the plasma membrane, this could elucidate the process of

173 vascular recovery in patients that do not experience severe COVID-19, although sepsis events can still  
174 take place<sup>4,12</sup>.

175 Altogether, we have shown that spike protein binding to integrin  $\alpha V\beta 3$  significantly impacts the  
176 integrity of the vascular barrier. Through its RGD site, SARS-CoV-2 effectively exploits downstream  
177 integrin signalling cascades to control permeability, which elucidates the dysfunctional vascular  
178 phenotype in COVID-19. A  $\alpha V\beta 3$  integrin inhibitor, Cilengitide, has displayed promising results in  
179 blocking this event. These early findings suggest that removing the initial signal that triggers integrin  
180 activation is capable of reducing the downstream signalling cascades that regulate cellular  
181 hyperpermeability in COVID-19. Evidently, endothelial cells are critical players during viral infection,  
182 and delineation of the mechanisms surrounding vascular integrity is required for the development of  
183 therapies to counteract the pathogenesis of SARS-CoV-2.

#### 184 **Contributions**

185 D.N. and S.K. wrote and edited the manuscript. D.N. performed the experiments. S.K. conceptualized  
186 the manuscript and provided critical review. All authors equally reviewed and approved the final  
187 manuscript.

#### 188 **Acknowledgements**

189 We would like to acknowledge the following individuals for their insight and conversations surrounding  
190 this topic: Gregory Bix, Timothy E. Gressett, Juan Pablo Robles, Prem Chapagain, and Tione Buranda.

191

192

193

194

195

196

197

198 **Figures**

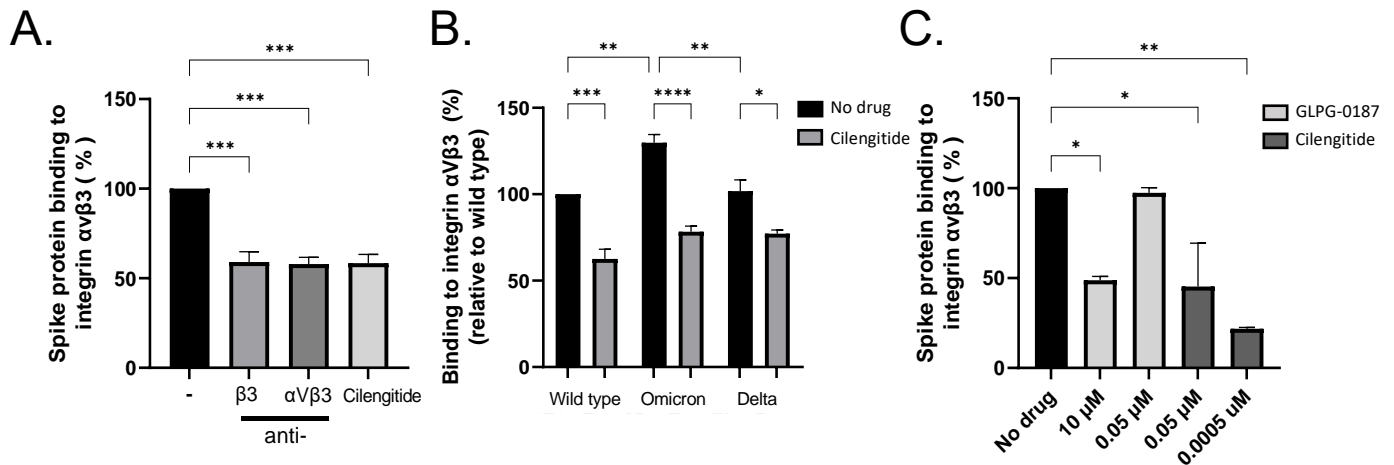

199 **Fig 1. Wild type, Delta, and Omicron Spike proteins bind integrin  $\alpha V\beta 3$  through its RGD site.** (A)  
200 Binding of SARS-CoV-2 spike protein to recombinant integrin  $\alpha V\beta 3$  in an ELISA-based assay.  
201 Integrin-blocking antibodies  $\alpha V\beta 3$  and  $\beta 3$  inhibit the interaction between recombinant spike protein  
202 and  $\alpha V\beta 3$ , similarly to Cilengitide (0.0005  $\mu M$ ) (One-way ANOVA, \*\*\*P<0.001). (B) Effects of  
203 Cilengitide on variants of concern Delta and Omicron spike proteins binding to integrin  $\alpha V\beta 3$  (One-  
204 way ANOVA, \*P<0.05, \*\*P<0.01, \*\*\*\*P<0.0001). (C) Effects of broad-spectrum pan integrin  
205 inhibitor GLPG-0187 on spike protein binding to integrin  $\alpha V\beta 3$ , compared to Cilengitide (One-way  
206 ANOVA). Values are mean  $\pm$  S.E.M., n=3.

207

208

209

210

211

212

213

214

215

216

217

218



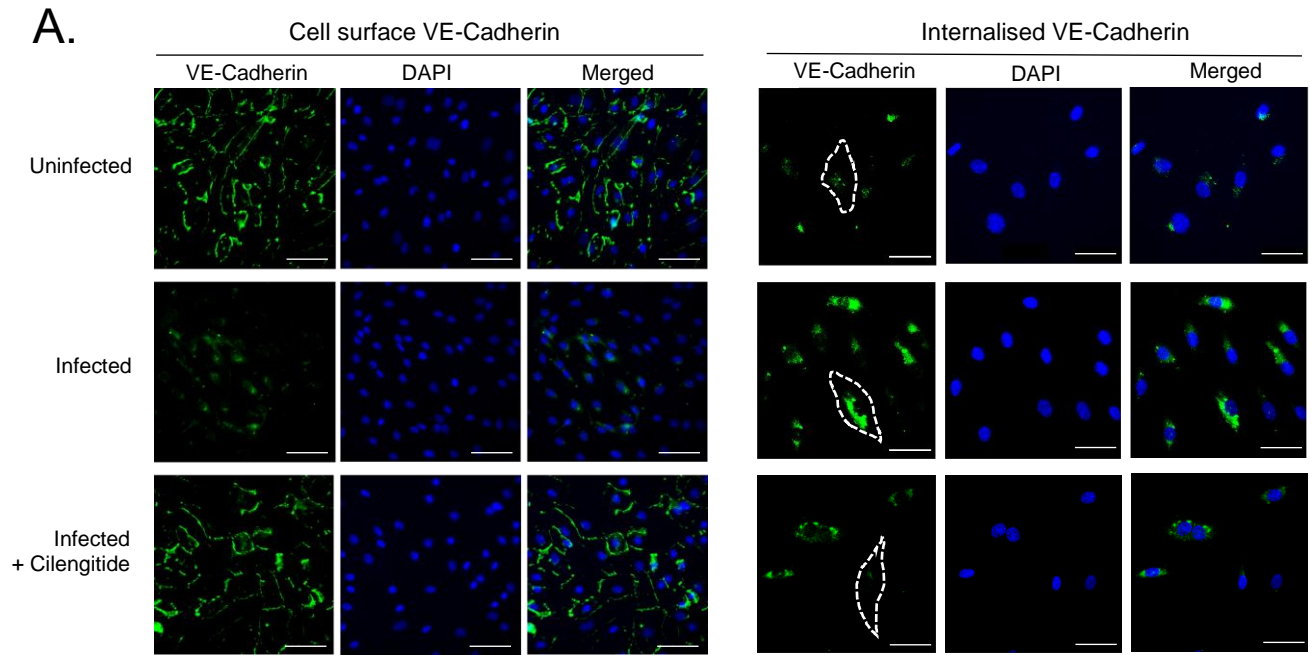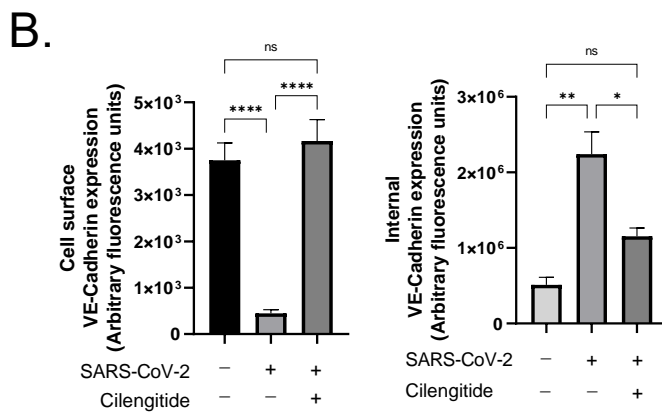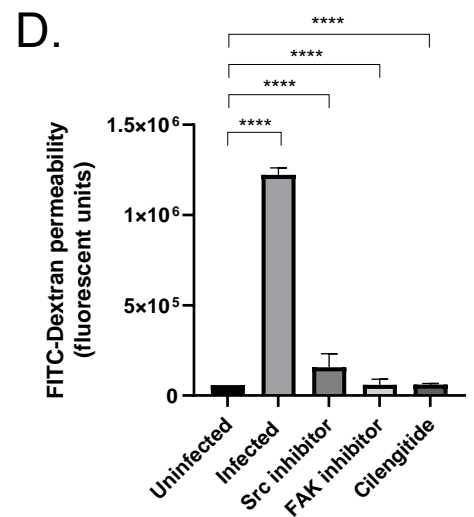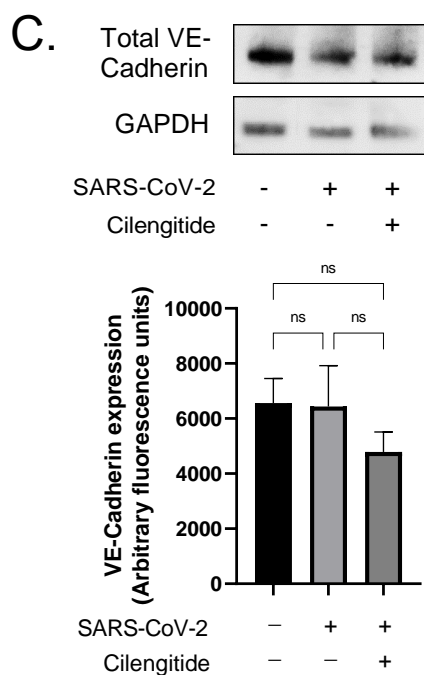

220 **Figure 2. Vascular-Endothelial Cadherin is targeted by RGD site of SARS-CoV-2 spike protein**  
221 **to drive vascular dysfunction.** (A) Immunofluorescence images of a confluent human endothelial cell  
222 monolayer stained with VE-Cadherin and DAPI, measured for either cell-surface or internal VE-  
223 Cadherin. Dotted lines represent the endothelial cell border as visualised using DIC. (B) Quantification  
224 of VE-Cadherin levels computed using ImageJ analysis, following background removal (One-way  
225 ANOVA). (C) Western blot analysis performed on total VE-Cadherin expression in healthy and SARS-  
226 CoV-2 infected endothelial cells. Treated cells were incubated with 0.0005  $\mu$ M Cilengitide.  
227 Representative densitometry performed on western blot. (D) Transwell permeability assays measured  
228 endothelial barrier integrity over 24 hours of SARS-CoV-2 infection, in the presence of either Src and  
229 FAK inhibitors or Cilengitide. Values are mean  $\pm$  S.E.M., n=3.

230

231

232

233

234

235

236

237

238

239

240

241

242

243

244

245

246

247

248

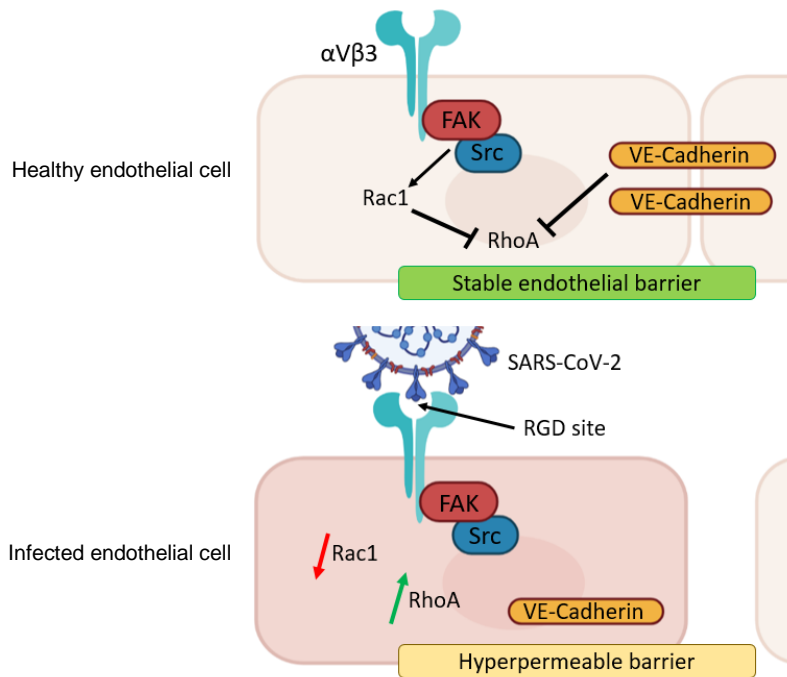

249

250 **Figure 3. Schematic illustration depicting theorized intracellular signalling cascade following**  
251 **spike protein engagement with integrin.** Top panel portrays healthy endothelial cell, where VE-  
252 Cadherin and Rac1 regulate and maintain low RhoA levels through FAK and Src signalling. Rac1 and  
253 RhoA signalling is tightly controlled via integrin engagement with an extracellular ligand. Bottom panel  
254 portrays infected endothelial cell, where persistent integrin activation leads to overactive FAK and Src  
255 activity, resulting in faulty cycling between RhoA and Rac1. RhoA levels rise, leading to cadherin  
256 phosphorylation via Src and FAK. Catenins, which confine VE-Cadherin at the endothelial junctions,  
257 cannot recognize phosphorylated VE-Cadherin which results in its internalization. This causes  
258 endothelial cells to pull apart and permeability to occur, promoting vascular leakage.

259

260

261

262

263

264

265

266

267

## 268 **References**

- 269 1 Nader, D., Fletcher, N., Curley, G. F. & Kerrigan, S. W. SARS-CoV-2 uses major endothelial  
270 integrin alphavbeta3 to cause vascular dysregulation in-vitro during COVID-19. *PLoS One* **16**,  
271 e0253347, doi:10.1371/journal.pone.0253347 (2021).
- 272 2 Raghavan, S., Kenchappa, D. B. & Leo, M. D. SARS-CoV-2 Spike Protein Induces  
273 Degradation of Junctional Proteins That Maintain Endothelial Barrier Integrity. *Front*  
274 *Cardiovasc Med* **8**, 687783, doi:10.3389/fcvm.2021.687783 (2021).
- 275 3 Li, R. *et al.* Vitronectin increases vascular permeability by promoting VE-cadherin  
276 internalization at cell junctions. *PLoS One* **7**, e37195, doi:10.1371/journal.pone.0037195  
277 (2012).
- 278 4 Xiao, K. *et al.* Mechanisms of VE-cadherin processing and degradation in microvascular  
279 endothelial cells. *J Biol Chem* **278**, 19199-19208, doi:10.1074/jbc.M211746200 (2003).
- 280 5 Amruta, N. *et al.* In Vivo protection from SARS-CoV-2 infection by ATN-161 in k18-hACE2  
281 transgenic mice. *Life Sci* **284**, 119881, doi:10.1016/j.lfs.2021.119881 (2021).
- 282 6 Beddingfield, B. J. *et al.* The Integrin Binding Peptide, ATN-161, as a Novel Therapy for  
283 SARS-CoV-2 Infection. *JACC Basic Transl Sci* **6**, 1-8, doi:10.1016/j.jacbts.2020.10.003  
284 (2021).
- 285 7 Robles, J. P. *et al.* The spike protein of SARS-CoV-2 induces endothelial inflammation through  
286 integrin alpha5beta1 and NF-kappaB signalling. *J Biol Chem*, 101695,  
287 doi:10.1016/j.jbc.2022.101695 (2022).
- 288 8 Simons, P. *et al.* Integrin activation is an essential component of SARS-CoV-2 infection. *Sci*  
289 *Rep* **11**, 20398, doi:10.1038/s41598-021-99893-7 (2021).
- 290 9 Md Lokman Hossen, P. B., Tej Sharma, Bernard Gerstman, Prem Chapagain. Significance of  
291 the RBD mutations in the SARS-CoV-2 Omicron: from spike opening to antibody escape and  
292 cell attachment. *BioRxiv*, doi: <https://doi.org/10.1101/2022.01.21.477244> (2022).
- 293 10 Huntington, K. E. *et al.* Integrin/TGF-beta1 inhibitor GLPG-0187 blocks SARS-CoV-2 Delta  
294 and Omicron pseudovirus infection of airway epithelial cells which could attenuate disease  
295 severity. *medRxiv*, doi:10.1101/2022.01.02.22268641 (2022).
- 296 11 Pulous, F. E., Grimsley-Myers, C. M., Kansal, S., Kowalczyk, A. P. & Petrich, B. G. Talin-  
297 Dependent Integrin Activation Regulates VE-Cadherin Localization and Endothelial Cell  
298 Barrier Function. *Circ Res* **124**, 891-903, doi:10.1161/CIRCRESAHA.118.314560 (2019).
- 299 12 Zhou, F. *et al.* Clinical course and risk factors for mortality of adult inpatients with COVID-19  
300 in Wuhan, China: a retrospective cohort study. *Lancet* **395**, 1054-1062, doi:10.1016/S0140-  
301 6736(20)30566-3 (2020).
- 302 13 Stupp, R. *et al.* Cilengitide combined with standard treatment for patients with newly diagnosed  
303 glioblastoma with methylated MGMT promoter (CENTRIC EORTC 26071-22072 study): a

- 304 multicentre, randomised, open-label, phase 3 trial. *Lancet Oncol* **15**, 1100-1108,  
305 doi:10.1016/S1470-2045(14)70379-1 (2014).
- 306 14 Gottlieb, R. L. *et al.* Effect of Bamlanivimab as Monotherapy or in Combination With  
307 Etesevimab on Viral Load in Patients With Mild to Moderate COVID-19: A Randomized  
308 Clinical Trial. *JAMA* **325**, 632-644, doi:10.1001/jama.2021.0202 (2021).
- 309 15 Planas, D. *et al.* Considerable escape of SARS-CoV-2 Omicron to antibody neutralization.  
310 *Nature* **602**, 671-675, doi:10.1038/s41586-021-04389-z (2022).
- 311 16 Nelson, C. M., Pirone, D. M., Tan, J. L. & Chen, C. S. Vascular endothelial-cadherin regulates  
312 cytoskeletal tension, cell spreading, and focal adhesions by stimulating RhoA. *Mol Biol Cell*  
313 **15**, 2943-2953, doi:10.1091/mbc.e03-10-0745 (2004).
- 314 17 Potter, M. D., Barbero, S. & Cheresh, D. A. Tyrosine phosphorylation of VE-cadherin prevents  
315 binding of p120- and beta-catenin and maintains the cellular mesenchymal state. *J Biol Chem*  
316 **280**, 31906-31912, doi:10.1074/jbc.M505568200 (2005).
- 317 18 Adam, A. P., Sharenko, A. L., Pumiglia, K. & Vincent, P. A. Src-induced tyrosine  
318 phosphorylation of VE-cadherin is not sufficient to decrease barrier function of endothelial  
319 monolayers. *J Biol Chem* **285**, 7045-7055, doi:10.1074/jbc.M109.079277 (2010).

320
